# Supplementary material for: Discovery of Sex-Determining Genes in Portunus trituberculatus: A Comparison of Male and Female Transcriptomes During Early Developmental Stages
Source: Frontiers journal article supplement (doi:10.3389/fmars.2021.811052), 2022-01-05
Supplement: Table_2.XLSX [file Table_2.XLSX]

## Sheet: Sheet1
#QueryId	NR SubjectDescription	KEGG Subject_annotation	SwissProt Subject_annotation	IPR_id	IPR_Annotation
evm.TU.Contig475.3	cuticular protein analogous to peritrophins 1-H precursor [Tribolium castaneum]	spidroin-2-like; K06236 collagen, type I, alpha (A)	-	NULL	NULL
evm.TU.Contig475.2	PREDICTED: golgin subfamily A member 5-like [Crassostrea gigas]	ikbkg; inhibitor of kappa light polypeptide gene enhancer in B-cells, kinase gamma; K07210 inhibitor of nuclear factor kappa-B kinase subunit gamma (A)	Golgin subfamily A member 5 OS=Danio rerio GN=golga5 PE=2 SV=1	NULL	NULL
evm.TU.Contig475.1	PREDICTED: pseudouridine-metabolizing bifunctional protein C1861.05-like isoform X3 [Chrysemys picta bellii]	pseudouridine-metabolizing bifunctional protein C1861.05-like; K16330 pseudouridylate synthase / pseudouridine kinase [EC:4.2.1.70 2.7.1.83] (A)	Pseudouridine-5'-phosphate glycosidase OS=Clostridium botulinum (strain Langeland / NCTC 10281 / Type F) GN=psuG PE=3 SV=1	NULL	NULL
evm.TU.Contig475.7	PREDICTED: all-trans-retinol 13,14-reductase [Fundulus heteroclitus]	hypothetical protein; K09516 all-trans-retinol 13,14-reductase [EC:1.3.99.23] (A)	Putative all-trans-retinol 13,14-reductase OS=Danio rerio GN=retsat PE=2 SV=1	NULL	NULL
evm.TU.Contig475.4	hypothetical protein CAPTEDRAFT_205242 [Capitella teleta]	-	-	IPR005428	Adhesion molecule CD36
evm.TU.Contig475.6	PREDICTED: putative all-trans-retinol 13,14-reductase-like [Saccoglossus kowalevskii]	putative all-trans-retinol 13,14-reductase-like; K09516 all-trans-retinol 13,14-reductase [EC:1.3.99.23] (A)	Putative all-trans-retinol 13,14-reductase OS=Danio rerio GN=retsat PE=2 SV=1	NULL	NULL
evm.TU.Contig475.13	doublesex [Fenneropenaeus chinensis]	-	-	IPR001275	DM DNA-binding domain
evm.TU.Contig475.5	-	-	-	NULL	NULL
evm.TU.Contig475.8	-	-	-	NULL	NULL
evm.TU.Contig475.9	hypothetical protein LOTGIDRAFT_201054 [Lottia gigantea]	hypothetical protein; K08592 sentrin-specific protease 1 [EC:3.4.22.68] (A)	Sentrin-specific protease 1 OS=Mus musculus GN=Senp1 PE=2 SV=1	NULL	NULL
evm.TU.Contig475.11	Broad-complex protein isoform 4 [Penaeus monodon]	GB18588; sex determination protein fruitless-like; K13165 splicing factor, arginine/serine-rich 12 (A)	Longitudinals lacking protein, isoforms F/I/K/T OS=Drosophila melanogaster GN=lola PE=1 SV=1	NULL	NULL
evm.TU.Contig475.10	GK10155 [Drosophila willistoni]	GK10155 gene product from transcript GK10155-RA (EC:3.4.-.-); K08592 sentrin-specific protease 1 [EC:3.4.22.68] (A)	-	IPR020468	Nisin biosynthesis protein, NisC
evm.TU.Contig153.16	60S ribosomal protein L27 [Scylla paramamosain]	rpl27; ribosomal protein L27; K02901 large subunit ribosomal protein L27e (A)	60S ribosomal protein L27 OS=Danio rerio GN=rpl27 PE=2 SV=3	IPR001141	Ribosomal protein L27e
evm.TU.Contig153.1	-	-	-	NULL	NULL
evm.TU.Contig153.3	PREDICTED: GTPase-activating protein CdGAPr [Tribolium castaneum]	ARHGAP33; Rho GTPase activating protein 33; K17933 Rho GTPase-activating protein 33 (A)	Rho GTPase-activating protein 32 OS=Homo sapiens GN=ARHGAP32 PE=1 SV=1	NULL	NULL
evm.TU.Contig153.26	chymotrypsin [Scylla paramamosain]	testisin-like; K09640 transmembrane protease serine 9 [EC:3.4.21.-] (A)	Chymotrypsin BII OS=Litopenaeus vannamei PE=1 SV=1	IPR001254	Peptidase S1
evm.TU.Contig153.27	chymotrypsin [Scylla paramamosain]	testisin-like; K09640 transmembrane protease serine 9 [EC:3.4.21.-] (A)	Chymotrypsin BI OS=Litopenaeus vannamei PE=1 SV=1	IPR001254	Peptidase S1
evm.TU.Contig153.24	DN cadherin-like protein [Tribolium castaneum]	GH10145 gene product from transcript GH10145-RA; K10414 dynein heavy chain 2, cytosolic (A)	Neural-cadherin OS=Drosophila melanogaster GN=CadN PE=1 SV=2	IPR002126	Cadherin
evm.TU.Contig153.25	hypothetical protein DAPPUDRAFT_300527 [Daphnia pulex]	GH10145 gene product from transcript GH10145-RA; K10414 dynein heavy chain 2, cytosolic (A)	Neural-cadherin OS=Drosophila melanogaster GN=CadN PE=1 SV=2	IPR001881	EGF-like calcium-binding domain
evm.TU.Contig153.20.2	Broad-complex protein isoform 4 [Penaeus monodon]	broad-complex core protein isoform 6-like; K02174 broad-complex core protein (A)	Longitudinals lacking protein-like OS=Drosophila melanogaster GN=lolal PE=1 SV=1	NULL	NULL
evm.TU.Contig153.29	-	-	-	IPR000948	Ribosomal protein L7Ae, prokaryotes
evm.TU.Contig153.28	PREDICTED: myb/SANT-like DNA-binding domain-containing protein 4 [Crassostrea gigas]	-	-	IPR028002	Myb/SANT-like DNA-binding domain
evm.TU.Contig153.23	hypothetical protein, partial [Vibrio nigripulchritudo]	protocadherin Fat 4-like; K16669 protocadherin Fat 4 (A)	Protocadherin Fat 4 OS=Homo sapiens GN=FAT4 PE=1 SV=2	IPR002126	Cadherin
evm.TU.Contig153.21	hypothetical protein YQE_12949, partial [Dendroctonus ponderosae]	AAEL002557-PA; K03450 solute carrier family 7 (L-type amino acid transporter), other (A)	Putative L-type amino acid transporter 1-like protein MLAS OS=Homo sapiens GN=SLC7A5P1 PE=5 SV=1	IPR002293	Amino acid/polyamine transporter I
evm.TU.Contig153.6	hypothetical protein DAPPUDRAFT_205016 [Daphnia pulex]	N-acetylglucosaminyl-phosphatidylinositol biosynthetic protein; K03857 phosphatidylinositol glycan, class A [EC:2.4.1.198] (A)	Phosphatidylinositol N-acetylglucosaminyltransferase subunit A OS=Homo sapiens GN=PIGA PE=1 SV=1	IPR013234	PIGA, GPI anchor biosynthesis
evm.TU.Contig153.17	Macrophage mannose receptor 1, partial [Cariama cristata]	mrc1, mrc1l1; macrophage mannose receptor 1; K06560 mannose receptor, C type (A)	Macrophage mannose receptor 1 OS=Mus musculus GN=Mrc1 PE=1 SV=2	IPR001304	C-type lectin
evm.TU.Contig153.15	Solute carrier family 25 member 36, partial [Zootermopsis nevadensis]	solute carrier family 25 member 36; K15116 solute carrier family 25, member 33/36 (A)	Solute carrier family 25 member 36 OS=Gallus gallus GN=SLC25A36 PE=2 SV=1	IPR018108	Mitochondrial substrate/solute carrier
evm.TU.Contig153.14	PREDICTED: endothelin-converting enzyme 1 isoform X1 [Fopius arisanus]	endothelin-converting enzyme 1; K01415 endothelin-converting enzyme [EC:3.4.24.71] (A)	Endothelin-converting enzyme 1 OS=Cavia porcellus GN=ECE1 PE=2 SV=1	IPR018497	Peptidase M13, C-terminal domain
evm.TU.Contig153.19	hypothetical protein CAPTEDRAFT_168266 [Capitella teleta]	-	-	IPR002126	Cadherin
evm.TU.Contig153.18	-	-	-	IPR001717	Anion exchange protein
evm.TU.Contig153.7	hypothetical protein DAPPUDRAFT_235002 [Daphnia pulex]	carbohydrate sulfotransferase 11-like; K01017 chondroitin 4-sulfotransferase 11 [EC:2.8.2.5] (A)	-	IPR005331	Sulfotransferase
evm.TU.Contig153.5	PREDICTED: beta-1,4-glucuronyltransferase 1 [Orussus abietinus]	CG15483 gene product from transcript CG15483-RA (EC:2.4.1.149); K00741 N-acetyllactosaminide beta-1,3-N-acetylglucosaminyltransferase [EC:2.4.1.149] (A)	Beta-1,4-glucuronyltransferase 1 OS=Danio rerio GN=b4gat1 PE=2 SV=1	NULL	NULL
evm.TU.Contig153.4	CDC42 GTPase-activating protein, putative [Pediculus humanus corporis]	ARHGAP33; rho GTPase-activating protein 33; K17933 Rho GTPase-activating protein 33 (A)	Rho GTPase-activating protein 32 OS=Xenopus laevis GN=arhgap32 PE=2 SV=1	IPR000198	Rho GTPase-activating protein domain
evm.TU.Contig153.9	VLRC, partial [Lampetra planeri]	IGFALS; insulin-like growth factor binding protein, acid labile subunit; K17256 insulin-like growth factor-binding protein complex acid labile subunit (A)	Leucine-rich repeat-containing protein 17 OS=Homo sapiens GN=LRRC17 PE=2 SV=1	NULL	NULL
evm.TU.Contig153.11_evm.TU.Contig153.12	PREDICTED: uncharacterized protein LOC105381973 [Plutella xylostella]	-	-	NULL	NULL
evm.TU.Contig153.13	-	-	-	IPR001699	Transcription factor, T-box
evm.TU.Contig153.28	PREDICTED: myb/SANT-like DNA-binding domain-containing protein 4 [Crassostrea gigas]	-	-	IPR028002	Myb/SANT-like DNA-binding domain
evm.TU.Contig153.8	PREDICTED: insulin-like growth factor-binding protein complex acid labile subunit isoform X2 [Camponotus floridanus]	CPN2; carboxypeptidase N, polypeptide 2; K13023 carboxypeptidase N regulatory subunit (A)	Leucine-rich repeat-containing protein 15 OS=Mus musculus GN=Lrrc15 PE=2 SV=1	NULL	NULL
evm.TU.Contig153.19	hypothetical protein CAPTEDRAFT_168266 [Capitella teleta]	-	-	IPR002126	Cadherin
evm.TU.Contig153.39	hypothetical protein YQE_02817, partial [Dendroctonus ponderosae]	-	-	IPR006612	Zinc finger, C2CH-type
evm.TU.Contig153.38	PREDICTED: uncharacterized protein LOC103308487 [Acyrthosiphon pisum]	-	-	IPR006578	MADF domain
